# Supplementary material
Source: PubMed Central journal article supplement (PMC4827616)
Supplement: NIHMS774264-supplement-Supplemental.pdf [file NIHMS774264-supplement-Supplemental.pdf]

**Supplementary data to:**

**Sugar-sweetened beverage consumption and fatty liver disease in the  
Framingham Heart Study cohorts**

Jiantao Ma, Caroline S. Fox, Paul F. Jacques, Elizabeth K. Speliotes, Udo Hoffmann,  
Caren E. Smith, Edward Saltzman, Nicola M. McKeown

**Table of Contents**

Supplemental Table 1. Characteristics of participants according to cross-sectional consumption of diet soda..... 2

Supplemental Figure 1. Associations between cumulative average intake of sugar-sweetened beverage and measures of fatty liver ..... 3

**Supplemental Table 1. Characteristics of participants according to cross-sectional consumption of diet soda<sup>1</sup>**

| Median consumption<br>(servings/wk)    | Non-consumers<br>0 – 1 serving/mo | Consumers                       |                                |                     | P for<br>trend |
|----------------------------------------|-----------------------------------|---------------------------------|--------------------------------|---------------------|----------------|
|                                        |                                   | 1 serving/mo –<br><1 serving/wk | 1 serving/wk -<br><1 serving/d | ≥1 servings/d       |                |
| n=2634                                 | 0                                 | 1                               | 4                              | 13                  |                |
|                                        | 1233                              | 543                             | 402                            | 456                 |                |
| Age (y)                                | 51.3 (50.7, 51.8)                 | 51.3 (50.4, 52.2)               | 51.3 (50.3, 52.3)              | 50.5 (49.5, 51.5)   | 0.17           |
| Women (%)                              | 50.7 (48.0, 53.5)                 | 54.6 (50.4, 58.7)               | 56.6 (51.7, 61.4)              | 51.3 (46.7, 55.8)   | 0.99           |
| Current smoker (%)                     | 13.4 (11.6, 15.2)                 | 8.9 (6.3, 11.6)                 | 7.8 (4.7, 10.9)                | 13.4 (10.5, 16.4)   | 0.67           |
| Alcohol intake (g/d)                   | 7.2 (6.8, 7.7)                    | 8.1 (7.4, 8.8)                  | 7.8 (7.0, 8.6)                 | 6.8 (6.1, 7.6)      | 0.23           |
| Multivitamin user (%)                  | 50.2 (47.4, 52.9)                 | 51.4 (47.3, 55.6)               | 51.1 (46.2, 55.9)              | 50.4 (45.8, 54.9)   | 0.99           |
| Physical Activity Score                | 37.8 (37.4, 38.2)                 | 37.4 (36.7, 38.0)               | 37.1 (36.3, 37.8)              | 37.0 (36.3, 37.7)   | 0.07           |
| Education (%) <sup>2</sup>             | 47.4 (44.6, 50.2)                 | 44.7 (40.6, 48.9)               | 50.1 (45.2, 54.9)              | 49.1 (44.6, 53.7)   | 0.32           |
| BMI (kg/m <sup>2</sup> )               | 26.6 (26.3, 26.8)                 | 27.4 (27.0, 27.8)               | 28.2 (27.7, 28.7)              | 29.7 (29.2, 30.2)   | <0.001         |
| Waist circumference (cm)               | 93.9 (93.2, 94.7)                 | 95.7 (94.6, 96.8)               | 98.3 (97.0, 99.6)              | 101.0 (99.8, 102.3) | <0.001         |
| SAT (cm <sup>3</sup> ) <sup>3</sup>    | 2594 (2520, 2669)                 | 2789 (2676, 2901)               | 3041 (2910, 3172)              | 3370 (3246, 3494)   | <0.001         |
| VAT (cm <sup>3</sup> ) <sup>3</sup>    | 1604 (1556, 1652)                 | 1706 (1634, 1778)               | 1825 (1741, 1909)              | 2009 (1930, 2088)   | <0.001         |
| Hypertension (%)                       | 25.1 (22.7, 27.4)                 | 28.7 (25.2, 32.2)               | 28.3 (24.2, 32.3)              | 32.3 (28.5, 36.1)   | 0.002          |
| Dyslipidemia (%)                       | 44.1 (41.4, 46.8)                 | 47.7 (43.6, 51.8)               | 47.1 (42.3, 51.8)              | 52.7 (48.2, 57.1)   | 0.002          |
| Diabetes (%)                           | 3.2 (1.9, 4.4)                    | 4.0 (2.1, 5.9)                  | 8.5 (6.3, 10.7)                | 11.2 (9.2, 13.2)    | <0.001         |
| Impaired fasting glucose (%)           | 22.3 (19.9, 24.6)                 | 24.2 (20.7, 27.8)               | 24.4 (20.2, 28.6)              | 31.5 (27.5, 35.5)   | <0.001         |
| Energy intake (kcal/d)                 | 1947 (1913, 1981)                 | 1893 (1842, 1945)               | 1972 (1913, 2032)              | 2007 (1951, 2063)   | 0.02           |
| Fat (%EI)                              | 31.3 (31.0, 31.7)                 | 31.6 (31.0, 32.1)               | 32.3 (31.7, 32.9)              | 33.5 (32.9, 34.1)   | <0.001         |
| Carbohydrate (%EI)                     | 49.8 (49.4, 50.3)                 | 48.7 (48.0, 49.4)               | 48.1 (47.3, 48.9)              | 46.9 (46.1, 47.7)   | <0.001         |
| Protein (%EI)                          | 17.8 (17.6, 18.0)                 | 18.3 (18.1, 18.6)               | 18.4 (18.0, 18.7)              | 18.8 (18.5, 19.1)   | <0.001         |
| Dietary fiber (g/d) <sup>4</sup>       | 17.4 (17.1, 17.7)                 | 17.7 (17.2, 18.2)               | 17.8 (17.2, 18.4)              | 17.5 (17.0, 18.0)   | 0.80           |
| Total sugar (g/d) <sup>4</sup>         | 105.3 (103.3,<br>107.3)           | 99.4 (96.7, 102.3)              | 95.8 (92.8, 99.0)              | 90.2 (87.4, 93.0)   | <0.001         |
| Whole grains (g/d) <sup>4</sup>        | 18.2 (17.4, 19.1)                 | 19.5 (18.2, 20.9)               | 19.3 (17.7, 20.9)              | 16.6 (15.4, 18.0)   | 0.02           |
| Red meat (servings/d) <sup>4</sup>     | 0.7 (0.6, 0.7)                    | 0.7 (0.6, 0.7)                  | 0.7 (0.7, 0.8)                 | 0.8 (0.7, 0.8)      | <0.001         |
| Fruit intake (servings/d) <sup>4</sup> | 1.9 (1.9, 2.0)                    | 1.9 (1.8, 2.0)                  | 1.9 (1.8, 2.0)                 | 1.7 (1.6, 1.8)      | 0.003          |
| Vegetables (servings/d) <sup>4</sup>   | 2.8 (2.7, 2.8)                    | 2.8 (2.7, 3.0)                  | 2.8 (2.7, 3.0)                 | 2.9 (2.8, 3.1)      | 0.08           |
| Nuts (servings/d)                      | 1.2 (1.0, 1.3)                    | 1.1 (0.9, 1.3)                  | 1.3 (1.0, 1.5)                 | 1.2 (1.0, 1.5)      | 0.43           |
| SSB (servings/wk)                      | 3.6 (3.3, 3.8)                    | 2.4 (2.0, 2.8)                  | 2.1 (1.7, 2.5)                 | 1.7 (1.2, 2.1)      | <0.001         |
| DGAI                                   | 9.3 (9.2, 9.5)                    | 9.2 (9.0, 9.5)                  | 9.1 (8.9, 9.4)                 | 8.8 (8.5, 9.0)      | <0.001         |

1. Values are means and 95%CI.

2. Education level: college or above

3. n=2556 for VAT and SAT

4. Geometric means and 95% CI

5. DGAI: dietary guideline adherence index

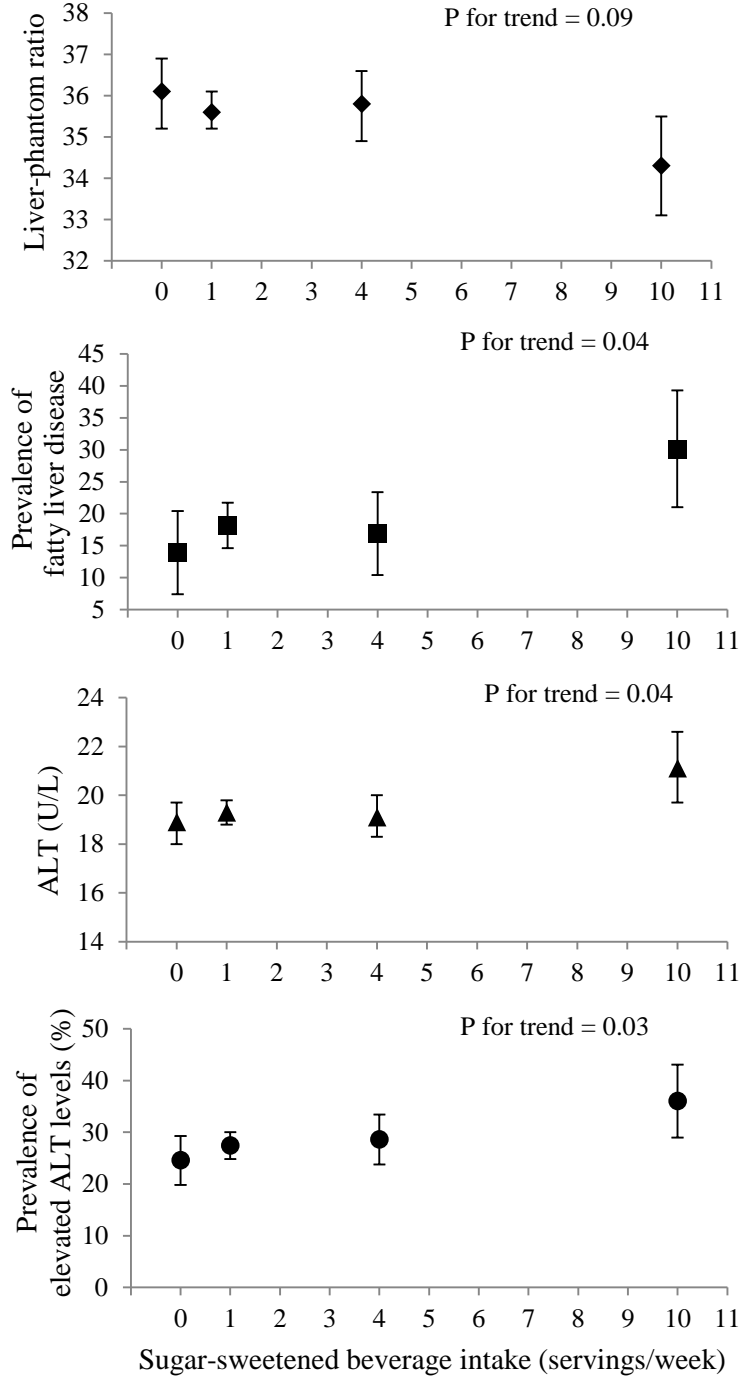

**Supplemental Figure 1. Associations between cumulative average intake of sugar-sweetened beverage and measures of fatty liver.** Symbols are (geometric) means or proportions and 95% CI. Models were adjusted for age, gender, energy intake, alcohol intake, dietary fiber, dietary fat (% of energy), dietary protein (%energy), smoking status, and BMI. Sample size was 888 for liver-phantom ratio and fatty liver (%) and 2029 for ALT (U/L) and elevated ALT levels.
